# Supplementary material
Source: HighWire-hosted journal article supplement (https://cmajopen.ca/highwire/filestream/89781/field_highwire_adjunct_files/4/open-2022-0102-original-submission.pdf)
Supplement: open-2022-0102-original-submission.pdf [file open-2022-0102-original-submission.pdf]

## Impact of the COVID-19 pandemic on choice of first cancer treatment: a population-based study

Rui Fu<sup>1,2,3</sup> PhD, Rinku Sutradhar<sup>1,2</sup> PhD, Qing Li<sup>1</sup> MMath, Timothy P. Hanna<sup>4,5</sup> MD PhD, Kelvin KW Chan<sup>6,7</sup> MD PhD, Jonathan C. Irish MD MSc<sup>2,8</sup>, Natalie Coburn<sup>1,2,7,9</sup> MD MPH, Julie Hallett<sup>1,2,6,9</sup> MD MSc, Anna Dare<sup>1,2,9</sup> MBChB PhD, Simron Singh<sup>1,2,10</sup> MD MPH, Ambica Parmar<sup>1,10</sup> MD MSc, Craig C. Earle<sup>1,10</sup> MD MSc, Lauren Lapointe-Shaw<sup>1,2,10</sup> MD PhD, Monika K. Krzyzanowska<sup>1,2,10</sup> MD MPH, Antonio Finelli<sup>1,2,9</sup> MD MSc, Alexander V. Louie<sup>11</sup> MD PhD, Nicole J. Look Hong<sup>1,2,9</sup> MD MSc, Ian J. Witterick<sup>3,7,8</sup> MD MSc, Alyson Mahar<sup>12</sup> PhD, David R. Urbach<sup>1,13</sup> MD MSc, Daniel I. McIsaac<sup>1,14</sup> MD MPH, Danny Enepekides<sup>3</sup> MD MPH, Antoine Eskander<sup>1,2,3</sup> MD ScM

### Author Affiliations

1. ICES, Toronto, Ontario, Canada
2. Institute of Health Policy, Management, and Evaluation, University of Toronto, Toronto, Ontario, Canada
3. Department of Otolaryngology – Head and Neck Surgery, University of Toronto, Toronto, Ontario, Canada
4. Cancer Research Institute, Division of Cancer Care and Epidemiology, Queen’s University, Kingston, Ontario, Canada
5. Ontario Institute for Cancer Research (OICR), Ontario, Canada
6. Odette Cancer Centre – Sunnybrook Health Sciences Centre, Toronto, Ontario, Canada
7. Ontario Health – Cancer Care Ontario, Toronto, Ontario, Canada
8. Department of Otolaryngology – Head & Neck Surgery/Surgical Oncology, University of Toronto, Princess Margaret Cancer Centre, Toronto, Ontario, Canada
9. Department of Surgery, University of Toronto, Toronto, Ontario, Canada
10. Department of Medicine, University of Toronto, Toronto, Ontario, Canada
11. Department of Radiation Oncology, University of Toronto, Ontario, Canada
12. Department of Community Health Sciences, University of Manitoba, Winnipeg, Manitoba, Canada
13. Department of Surgery, Women’s College Hospital, Toronto, Ontario, Canada
14. Department of Anesthesiology and Pain Medicine, The Ottawa Hospital, Ottawa, Ontario, Canada.

### Corresponding Author

Antoine Eskander, MD, ScM  
 2075 Bayview Ave., M1-102  
 Toronto, ON, M4N 3M5  
 Tel: 416-480-6705  
 Email: [antoine.eskander@mail.utoronto.ca](mailto:antoine.eskander@mail.utoronto.ca)

**Submit to:** CMAJ (Research)

**Word count (main text):** 2,495 (max 2,500)

**Word count (abstract):** 250 (max 250)

**Number of tables/figures:** 2/2

1  
2  
3 **Funding:** This work was supported by a Sunnybrook Research Institute and Sunnybrook  
4 Foundation COVID-19 Response Grant and a Canadian Institutes of Health Research Operating  
5 Grant #179892. The funders were not involved in any part of the study, including design and  
6 conduct of the study; collection, management, analysis, and interpretation of the data;  
7 preparation, review, or approval of the manuscript; and decision to submit the manuscript for  
8 publication.  
9  
10

11  
12 **Competing Interests:** Dr. Antoine Eskander reported receiving grants from Merck and personal  
13 fees from Bristol-Myers Squibb outside the submitted work. No other competing interests were  
14 declared.  
15  
16

17  
18 **Contributors:** Drs. Antoine Eskander and Rinku Sutradhar had full access to the study data and  
19 take responsibility for the integrity of the data and the accuracy of the data analysis. Qing Li was  
20 involved in the data analysis. Dr. Rui Fu led the drafting of the manuscript. All authors  
21 contributed to the conception of the study, interpretation of the data, review and approval of the  
22 manuscript, and decision to submit the manuscript for publication.  
23  
24

### 25 **Acknowledgments**

26  
27 This study was supported by the ICES (previously known as the Institute for Clinical Evaluative  
28 Sciences), which is funded by an annual grant from the Ontario Ministry of Health (MOH) and  
29 the Ministry of Long-Term Care (MLTC). The opinions, results, and conclusions reported in this  
30 article are those of the authors and are independent from the funding sources. Parts of this  
31 material are based on data and/or information compiled and provided by Ontario Health (Cancer  
32 Care Ontario) [CCO], the Ontario Cancer Registry (OCR), the Canadian Institute for Health  
33 Information (CIHI), and Immigration, Refugees and Citizenship Canada (IRCC) current to May  
34 31, 2017. However, the analyses, conclusions, opinions, and statements expressed in the material  
35 are those of the authors, and not necessarily those of CCO, CIHI or IRCC. Parts of this report are  
36 based on Ontario Registrar General (ORG) information on deaths, the original source of which is  
37 Service Ontario. The views expressed therein are those of the authors and do not necessarily  
38 reflect those of ORG or the Ministry of Government and Consumer Services. No endorsement by  
39 ICES, Ontario Health, CCO, MOH, MLTC, CIHI, IRCC, ORG, Service Ontario, or the Ministry  
40 of Government and Consumer Services is intended or should be inferred.  
41  
42  
43  
44  
45  
46  
47  
48  
49  
50  
51  
52  
53  
54  
55  
56  
57  
58  
59  
60

## ABSTRACT

**Background:** COVID-19 has caused significant shifts in the management of newly diagnosed cancer. We sought to quantify the pandemic impact on the modality of first cancer treatment (surgery, chemotherapy, radiation, or no treatment).

**Methods:** In this population-based study using administrative databases of Ontario, we identified adults diagnosed with cancer during January 2016-November 2020 and their modality of first cancer treatment received within 1-year post-diagnosis. Segmented Poisson regressions were applied to each modality to estimate the change in mean service volume per thousand patients (rate) at the start of the pandemic (the week of March 15, 2020) and change in the weekly trend in rate during the pandemic (March 15, 2020-November 7, 2020) relative to pre-pandemic (January 3, 2016-March 14, 2020).

**Results:** Among 313,499 persons with cancer, 29,602 (9.4%) were diagnosed in the pandemic. During the first week of COVID-19, mean upfront surgical rate declined by 14% (95% CI: 10%-18%), while chemotherapy and radiation rose by 38% (95% CI: 30%-46%) and 12% (95% CI: 5%-18%). The mean rate of no treatment decreased by 10% (95% CI: 4%-16%). Afterwards until November 7, 2020, upfront surgical rate increased at 0.7% for each week (95% CI: 0.5%-1.0%), while chemotherapy and radiation rates were decreasing at 1.5% (95% CI: 1.2%-1.8%) and 0.5% (0.2%-0.8%) per week.

**Interpretation:** Non-surgical therapy was adopted as first-line cancer treatment to compensate for reduced surgical capacity at the start of COVID-19. Future studies need to elucidate the impact of these practice changes on patient safety, treatment outcomes, and quality of life.

## INTRODUCTION

The COVID-19 pandemic has put cancer treatment systems around the world under immense pressure, forcing redefinitions of care processes to cope with resource shortages and social distancing policies.<sup>1</sup> For patients who received a cancer diagnosis during the pandemic, decisions on treatment became more complex, now taking into account risks of COVID-19 infection, travel restrictions, and reduced inpatient capacity in addition to other patient, disease and system factors.<sup>2</sup> In anticipation of significant delays in elective cancer surgery, physicians were directed to give surgical priority to a small group of patients (such as those with an immediate threat to life or limb; with obstructions, bleeding or perforations; or with progressive disease under neoadjuvant systemic therapy) and utilize non-surgical therapy to a larger extent for others.<sup>3</sup> However, evidence is scarce on the real-world impact of those policies at the population level, particularly if physician preference on how to treat newly diagnosed cancer has altered.<sup>4</sup> Hence, in this study, we used data from Ontario, Canada, a universal healthcare system with a population of 14.7 million, to contribute to better understanding on the shifts in first cancer treatment modalities used during the pandemic. This information is needed for recovery planning and to guide policy decisions in future health system emergencies.

## METHODS

### Study design and population

This was a retrospective population-based cohort analysis based in Ontario, Canada where all permanent residents are insured under a universal healthcare system.<sup>5</sup> The study cohort comprised Ontario residents age 18 or above who were diagnosed with cancer between January 3, 2016 and November 7, 2020 (**Appendix 1**). Only first cancer diagnosis over this period was

1  
2  
3 considered. Each patient was followed for 1 year after the date of cancer diagnosis (the date of  
4 specimen taken<sup>6</sup>), or until the date of death, or to June 26, 2021, whichever occurred first.

7 Patients with multiple types of cancer diagnosed on the same day, those who were non-Ontario  
8 residents at diagnosis, or who were younger than 18 at diagnosis were excluded. We also  
9  
10 excluded patients with certain cancer diagnoses; specifically, we excluded melanoma and skin  
11  
12 cancer to ensure a reliable capture of hospital-based cancer-directed surgical procedures, as these  
13  
14 cancers are frequently treated in the outpatient setting. We also excluded patients with cancers  
15  
16 primarily labelled as ophthalmologic and paraneoplastic neurological syndromes as these cancers  
17  
18 accounted for less than 0.04% of our cohort (**Figure 1**).

### 25 26 **Data sources**

27  
28 Records of cancer diagnoses were retrieved from the Ontario Cancer Registry (OCR) that  
29  
30 captures 98% of all cancer cases across the province.<sup>7</sup> At the time of the present analysis  
31  
32 (January 2022), the OCR was updated to December 31, 2021 with reliable data available until  
33  
34 November 7, 2020.<sup>8</sup> Receipt of cancer-directed surgery was determined from hospital abstract  
35  
36 databases of the Canadian Institute for Health Information, and confirmed with the diagnosis  
37  
38 records from OCR to ensure the surgical procedure matched with the cancer site and that the  
39  
40 procedure was a resection rather than a biopsy.<sup>9</sup> Radiation and chemotherapy visits were  
41  
42 determined using physician billing from the Ontario Health Insurance Plan (OHIP) claims  
43  
44 database. Individuals who immigrated to Ontario between January 1985 to May 2017 were  
45  
46 identified from the Immigration, Refugee and Citizenship Canada (IRCC) Permanent Resident  
47  
48 Database (with data from that period). Rurality was determined from Statistics Canada's Postal  
49  
50 Code Conversion File and defined as living in rural areas or small towns with an urban  
51  
52  
53  
54  
55  
56  
57  
58  
59  
60

1  
2  
3 population of less than 10,000.<sup>10</sup> Material deprivation was calculated using the Ontario  
4  
5 Marginalization Index with data from the latest Canadian census.<sup>11</sup> These datasets were linked  
6  
7 using unique encoded identifiers and analyzed at ICES.  
8  
9  
10

### 11 12 **Outcome – the modality of first cancer treatment**

13  
14 For each patient, we determined the modality of first cancer treatment received within a  
15  
16 maximum of 1-year after date of diagnosis to be either surgery, chemotherapy, or radiation. A  
17  
18 separate “untreated” category was created for those who did not receive any cancer treatment  
19  
20 during the follow-up period (**Appendix 2**). For patients receiving hormonal therapy as the first  
21  
22 cancer treatment, we also classified them as “untreated” since this procedure was not fully  
23  
24 captured in the OHIP claims database. We handled patients receiving more than one modality of  
25  
26 first cancer treatment on the same day (n=880, less than 0.3% of the cohort) with the following:  
27  
28 if one of those modalities was surgery, we assumed the other modality (chemotherapy or  
29  
30 radiation) had been administered prior to surgery on that day, and thus considered the non-  
31  
32 surgical modality to be the first. If chemotherapy and radiation occurred on the same day, we  
33  
34 assigned radiation as the first modality.  
35  
36  
37  
38  
39  
40  
41

### 42 **Statistical analysis**

43  
44 We used March 15, 2020, when all hospitals in Ontario were directed by the province’s Chief  
45  
46 Medical Officer of Health to halt non-emergent or elective procedures, to create a pre-pandemic  
47  
48 period (January 3, 2016 to March 14, 2020) and a pandemic period (March 15, 2020 to  
49  
50 November 7, 2020).<sup>12</sup> Comparisons of patient characteristics were conducted between the two  
51  
52 periods, where a standardized difference exceeding 0.10 indicated a significant imbalance.<sup>13</sup>  
53  
54  
55  
56  
57  
58  
59  
60

1  
2  
3 For each modality of first cancer treatment, we conducted separate segmented Poisson  
4 regression analyses to examine trends in crude rates, defined as the weekly number of recipients  
5 per thousand patients. Three parameter estimates were of interest: the pre-pandemic weekly trend  
6 (slope) in the rate, the immediate change in mean rate at the start of the pandemic (relative  
7 change in intercept), and further change in slope during the pandemic. This method has been  
8 previously used by our group to study the trends in the volume of cancer incidence and cancer-  
9 directed surgery and the rate of virtual physician visits in Ontario amid the pandemic.<sup>8,9,14</sup> All  
10 regression analyses were 2-sided and statistical significance was set at p-value<0.05. Analyses  
11 were performed on SAS Enterprise Guide 7.15 (SAS Institute).  
12  
13  
14  
15  
16  
17  
18  
19  
20  
21  
22  
23  
24  
25

## 26 **Ethics approval**

27 The use of the data in this study is authorized under section 45 of Ontario's Personal Health  
28 Information Protection Act and therefore does not require review by a Research Ethics Board.  
29  
30  
31  
32  
33  
34

## 35 **RESULTS**

36 A total of 313,499 persons with cancer were included in the study cohort (**Table 1**). Among  
37 them, the vast majority (n=283,897, 90.6%) were diagnosed in pre-pandemic period, while less  
38 than 10% (n=29,602, 9.4%) of patients received a cancer diagnosis during the pandemic. We did  
39 not detect any significant difference of sociodemographic and clinical characteristics between the  
40 two groups of patients (all standardized differences<0.05).  
41  
42  
43  
44  
45  
46  
47  
48

49 During the first week of COVID-19, the mean rate of upfront surgery (i.e., number of  
50 patients receiving surgery as first cancer treatment per thousand patients) dropped immediately  
51 by 14% (rate ratio [RR]: 0.86, 95% confidence interval [CI]: 0.82-0.90). At the same time,  
52  
53  
54  
55  
56  
57  
58  
59  
60

1  
2  
3 chemotherapy and radiation mean rates were both increasing by 38% (RR: 1.38, 95% CI: 1.30-  
4 1.46) and 12% (RR: 1.12, 95% CI: 1.05-1.18). This caused the mean rate of any treatment  
5  
6 received within 1-year after diagnosis to rise by 3% (RR: 1.03, 95% CI: 1.01-1.05) and the rate  
7  
8 of no treatment to decrease by 10% (RR: 0.90, 95% CI: 0.84-0.96) at the start of the pandemic.  
9

10  
11  
12 During the pandemic period (March 15 to November 7, 2020), the rate of upfront surgery  
13  
14 increased further by 0.7% (RR: 1.007, 95% CI: 1.005-1.010) for each week, and during the week  
15  
16 of July 26, 2020 (i.e., the 20<sup>th</sup> week since the start of COVID-19), surgical rate had fully  
17  
18 recovered to pre-pandemic weekly levels (**Figure 2**). Upfront chemotherapy and radiation rates  
19  
20 decreased (after their initial rise), with a weekly decrement of 1.5% (RR: 0.985, 95% CI: 0.982-  
21  
22 0.988) and 0.5% (RR: 0.995, 95% CI: 0.992-0.998). For chemotherapy, we found that after its  
23  
24 38% rise in rate at the beginning of the pandemic, its rate has fully reduced to pre-pandemic  
25  
26 levels 21 weeks after the start of COVID-19 (during the week of August 2, 2020). We found no  
27  
28 further change in the rate of no treatment (RR: 1.003, 95% CI: 0.9997-1.007) or any treatment  
29  
30 (RR: 0.999, 95% CI: 0.998-1.000) during the pandemic.  
31  
32  
33  
34  
35  
36  
37  
38  
39

## 40 INTERPRETATION

41 This population-based cohort study examines the COVID-19 pandemic impact on the modalities  
42  
43 of first cancer treatment. Using records of over 310,000 persons with cancer in Ontario, Canada,  
44  
45 we found that with the arrival of the pandemic, upfront surgical rate decreased by 14% with a  
46  
47 corresponding rise in the rate of non-surgical therapy, especially chemotherapy. It took 20 weeks  
48  
49 for both surgery and chemotherapy to return to pre-pandemic weekly utilization level. At the  
50  
51 start of the pandemic, the number of untreated patients per thousand cancer diagnoses declined  
52  
53 by 10%.  
54  
55  
56  
57  
58  
59  
60



1  
2  
3 Consistent with an early work from our group<sup>9</sup>, we found an immediate decline in use of  
4 surgery as initial cancer therapy when pandemic control measures first launched. Furthermore,  
5  
6 we went beyond the examination of weekly surgical volume to assessing the rate of upfront  
7  
8 surgery per thousand cancer diagnoses, and thereby, accounted for the pandemic-related  
9  
10 reduction in cancer incidence (in the denominator). Due to the suspension of cancer screening  
11  
12 and disruptions in other care services that are key in cancer diagnosis and staging (such as in-  
13  
14 person oncologist visits)<sup>1,15</sup>, cancer incidence has dropped by 34% in Ontario.<sup>8</sup> Hence, our results  
15  
16 imply that even when facing a much smaller volume of new persons with cancer, the surgical  
17  
18 system was unable to provide upfront surgery at pre-pandemic capacity, which emphasizes the  
19  
20 extent to which the pandemic impacted cancer services. It is also possible that because the case-  
21  
22 mix of incident cancers has shifted, particularly more were presented with advanced-stage  
23  
24 cancer<sup>16</sup>, the rate of upfront surgery has dropped correspondingly. Future studies need to  
25  
26 quantify the proportion of patients who would have had surgery first but received neoadjuvant  
27  
28 therapy instead during the pandemic. These data are required to identify potentially at-risk  
29  
30 persons with cancer who might suffer the negative consequences of surgical delays so that  
31  
32 physicians can plan care accordingly to mitigate those repercussions.

33  
34  
35  
36  
37  
38  
39  
40 The rate of chemotherapy use as initial cancer treatment increased by 38% when the  
41  
42 pandemic started, and for the next 20 weeks chemotherapy utilization remained higher than its  
43  
44 pre-pandemic levels. These results contribute to existing evidence on the expanded use of  
45  
46 neoadjuvant chemotherapy for patients who would have received surgery upfront during the  
47  
48 pandemic.<sup>15-17</sup> This speculation is at least partially corroborated by our observation that at  
49  
50 around the same time after the arrival of COVID-19, surgery and chemotherapy rates have  
51  
52 simultaneously recovered to pre-pandemic levels. Another possibility is due to stage migration,  
53  
54  
55  
56  
57  
58  
59  
60

1  
2  
3 persons with cancer diagnosed in the pandemic were more likely to require palliative  
4  
5 chemotherapy or chemotherapy combined with radiotherapy.<sup>18</sup> In Ontario, the increased uptake  
6  
7 of chemotherapy may also be attributed to the expanded public insurance coverage for hospital-  
8  
9 administered cancer drugs that was introduced shortly after the start of COVID-19.<sup>19</sup> Because of  
10  
11 the removal of financial disincentives, more patients may have been willing to choose  
12  
13 chemotherapy as their initial and continued modality of care. Still, a closer examination of if, and  
14  
15 how soon, patients who had initiated chemotherapy in the early pandemic were assessed for and  
16  
17 eventually received surgery is warranted. Furthermore, having an influx of newly diagnosed  
18  
19 patients initiating chemotherapy has patient safety implications, as a meta-analysis study found  
20  
21 chemotherapy to be the only cancer treatment modality whose past-month use to be associated  
22  
23 with elevated risk of COVID-19-related death.<sup>20</sup> Further study that reports on outcomes among  
24  
25 patients receiving chemotherapy during the pandemic is required to guide clinical and drug  
26  
27 funding policies.  
28  
29  
30  
31  
32

33 We observed a 10% decrease in the mean rate of no treatment over the first post-  
34  
35 diagnosis year at the beginning of COVID-19. A potential explanation is that due to the drop in  
36  
37 cancer incidence volume at the start of COVID-19<sup>8</sup>, the demand for initial cancer therapy was  
38  
39 lowered, which, coupled with the large-scale cancelation of elective surgeries, preserved capacity  
40  
41 within the cancer system for non-surgical care delivery.<sup>21</sup> Additionally, we used a conservative  
42  
43 definition for “no treatment” by not counting hormonal therapy which may result in an  
44  
45 underestimation for treatment delivered as bridging therapy prior to definitive treatment. With  
46  
47 nearly 2,000 incident breast cancer cases and 1,600 incident prostate cancer cases in Ontario  
48  
49 being unidentified due to COVID-19<sup>8</sup> and a possible rise in use of hormonal therapy as first-line  
50  
51  
52  
53  
54  
55  
56  
57  
58  
59  
60

1  
2  
3 treatment for both cancers<sup>16,22</sup>, this would translate to an increased rate of “untreated” persons  
4  
5 with breast or prostate cancer in our results.  
6

7  
8 From a clinical practice perspective, it is important to examine to what extent these  
9  
10 temporary shifts in care revealed in our study will impact future oncologic practice. In the UK,  
11  
12 oncologists are considering short-course radiotherapy, rather than the conventionally favored  
13  
14 long-course chemoradiotherapy, as the first treatment for rectal cancer before surgery even  
15  
16 before the pandemic.<sup>2,23</sup> Further studies are required to assess if physicians plan to use the same  
17  
18 strategies to cope with the current ramp down of hospital services related to subsequent waves<sup>24</sup>  
19  
20 and if they will adopt the practice changes after the pandemic has ended. This type of analysis  
21  
22 was beyond the scope of our project and would require a different set of methods.  
23  
24  
25  
26  
27

## 28 **Limitations**

29  
30 As we aimed to provide a high-level description of pandemic-related shifts in first cancer  
31  
32 treatment modalities, analyses were not stratified by cancer type or stage. Further, this study only  
33  
34 concerns the modality of treatment without deeper evaluation of wait times, an established risk  
35  
36 factor for patient outcomes.<sup>25,26</sup> These unaddressed objectives need to be examined using large  
37  
38 administrative datasets with rich patient-level data. Next, we assumed patients who received  
39  
40 chemotherapy and radiation on the same day (without prior surgery) to always have initiated  
41  
42 radiation first. Although this simplification applies to most patients, some recipients of  
43  
44 concurrent chemoradiotherapy were given chemotherapy as a radiosensitizer on the day of first  
45  
46 dose of radiotherapy. Future study should examine these nuances of combined modality  
47  
48 treatment. Finally, a 1-year follow-up duration after date of cancer diagnosis was not observable  
49  
50 for those diagnosed between June 26, 2020-November 7, 2020. Thus, we may have  
51  
52  
53  
54  
55  
56  
57  
58  
59  
60

1  
2  
3 overestimated the proportion of the “untreated” group in this sub-cohort. However, due to its  
4  
5 small number (n=16,338, 5.2% of the cohort), we believe the impact to be low. Furthermore,  
6  
7 there were more patients receiving treatment during the pandemic than before and therefore if we  
8  
9 are missing some treatment, our effect sizes will only be larger. Nonetheless, future time-to-  
10  
11 event analysis that accounts for censoring should further investigate the pandemic impact on the  
12  
13 probability of and the wait times for receiving each modality of first cancer treatment.  
14  
15  
16  
17  
18

## 19 **CONCLUSION**

20  
21 During the first week of COVID-19 in Ontario, there was a 14% decrease in the volume of  
22  
23 upfront surgery per thousand persons with cancer (rate), accompanied by a 38% and 12% rise in  
24  
25 the rate of chemotherapy and radiation as first-line treatment. Meanwhile, the mean rate of no  
26  
27 treatment over the first post-diagnosis year decreased by 10%, largely due to a significant drop in  
28  
29 cancer incidence. Around 20 weeks into the pandemic, both surgery and chemotherapy rate  
30  
31 returned to pre-pandemic utilization levels. The findings of this study highlight a deviation from  
32  
33 the standard of care for many patients with unknown impact on outcomes including recurrence,  
34  
35 quality of life, and survival. Healthcare systems should work towards preserving resources to  
36  
37 manage newly diagnosed cancer according to standard of care by creating capacity in the system  
38  
39 even during subsequent COVID-19 waves and for future pandemics.  
40  
41  
42  
43  
44  
45  
46  
47  
48  
49  
50  
51  
52  
53  
54  
55  
56  
57  
58  
59  
60

## References

1. Riera R, Bagattini ÂM, Pacheco RL, Pachito DV, Roitberg F, Ilbawi A. Delays and Disruptions in Cancer Health Care Due to COVID-19 Pandemic: Systematic Review. *JCO Global Oncology*. 2021;(7):311-323. doi:10.1200/GO.20.00639
2. Richards M, Anderson M, Carter P, Ebert BL, Mossialos E. The impact of the COVID-19 pandemic on cancer care. *Nat Cancer*. 2020;1(6):565-567. doi:10.1038/s43018-020-0074-y
3. Ontario Health (Cancer Care Ontario). COVID-19 supplemental clinical guidance for patients with cancer. Published online December 23, 2021. Accessed January 21, 2022. <https://www.cancercareontario.ca/sites/ccocancercare/files/derivative/PandemicPlanningSupplementalGuidanceCancer.pdf>
4. Schoonbeek RC, de Jel DVC, van Dijk BAC, et al. Fewer head and neck cancer diagnoses and faster treatment initiation during COVID-19 in 2020: A nationwide population-based analysis. *Radiotherapy and Oncology*. 2022;167:42-48. doi:10.1016/j.radonc.2021.12.005
5. Ministry of Health. Schedule of benefits: Physician services under the Health Insurance Act (March 19, 2020 (Effective April 1, 2020)). Published online March 19, 2020. Accessed June 23, 2021. [https://www.health.gov.on.ca/en/pro/programs/ohip/sob/physerv/sob\\_master20200306.pdf](https://www.health.gov.on.ca/en/pro/programs/ohip/sob/physerv/sob_master20200306.pdf)
6. Ontario Health (Cancer Care Ontario). Data Book 2021-2022. Published online December 2020. Accessed January 27, 2022. <https://ext.cancercare.on.ca/ext/databook/db2122/databook.htm>
7. Ontario Health (Cancer Care Ontario). *Ontario Cancer Statistics 2020*. Ontario Health; 2020. Accessed July 16, 2021. <https://www.cancercareontario.ca/en/statistical-reports/ontario-cancer-statistics-2020/data-sources>
8. Eskander A, Li Q, Yu J, et al. Incident cancer detection during the COVID-19 pandemic. *Journal of the National Comprehensive Cancer Network*. 2022;20(3):276-284. doi:10.6004/jnccn.2021.7114
9. Eskander A, Li Q, Hallet J, et al. Access to cancer surgery in a universal health care system during the COVID-19 pandemic. *JAMA Netw Open*. 2021;4(3):e211104. doi:10.1001/jamanetworkopen.2021.1104
10. du Plessis V, Beshiri R, Bollman RD, Clemenson H. Definitions of rural. *Rural and Small Town Canada Analysis Bulletin*. 2001;3(3). Accessed December 2, 2021. <https://www150.statcan.gc.ca/n1/en/pub/21-006-x/21-006-x2001003-eng.pdf?st=Q98IWKhx>
11. Matheson FI, van Ingen T. *2016 Ontario Marginalization Index: User Guide*. St. Michael's Hospital; 2018. Accessed November 4, 2021. <https://www.publichealthontario.ca/-/media/documents/O/2017/on-marg-userguide.pdf>
12. Ministry of Health. Ontario hospitals asked to take a planned approach to ramping down elective surgeries. *Ontario Newsroom*. <https://news.ontario.ca/en/statement/56328/ontario-hospitals-asked-to-take-a-planned-approach-to-ramping-down-elective-surgeries>. Published March 15, 2020. Accessed June 23, 2021.
13. Austin PC. Using the Standardized Difference to Compare the Prevalence of a Binary Variable Between Two Groups in Observational Research. *Communications in Statistics - Simulation and Computation*. 2009;38(6):1228-1234. doi:10.1080/03610910902859574
14. Fu R, Sutradhar R, Li Q, Eskander A. Virtual and in-person visits by Ontario physicians in the COVID-19 era. *Journal of Telemedicine and Telecare*. 2022;Epub ahead of print. doi:10.1177/1357633X221086447

15. Waisberg F, Enrico D, Angel M, Chacón M. Cancer Treatment Adaptations in the COVID-19 Era. *JCO Oncology Practice*. 2020;16(6):305-307. doi:10.1200/OP.20.00218
16. Hawrot K, Shulman LN, Bleiweiss IJ, et al. Time to treatment initiation for breast cancer during the 2020 COVID-19 pandemic. *JCO Oncology Practice*. 2021;17(9):534-540. doi:10.1200/OP.20.00807
17. Parikh RB, Takvorian SU, Vader D, et al. Impact of the COVID-19 Pandemic on Treatment Patterns for Patients with Metastatic Solid Cancer in the United States. *Journal of the National Cancer Institute*. Published online December 10, 2021:djab225. doi:10.1093/jnci/djab225
18. Guven DC, Sahin TK, Yildirim HC, et al. Newly diagnosed cancer and the COVID-19 pandemic: tumour stage migration and higher early mortality. *BMJ Support Palliat Care*. Published online October 28, 2021:bmjspcare-2021-003301. doi:10.1136/bmjspcare-2021-003301
19. Naipaul RD, Mercer RE, Chan KK, Yeung L, Forbes L, Gavura S. Clinician Perspectives of COVID-19-Related Cancer Drug Funding Measures in Ontario. *Current Oncology*. 2021;28(2):1056-1066. doi:10.3390/curroncol28020103
20. Yekedüz E, Utkan G, Ürün Y. A systematic review and meta-analysis: the effect of active cancer treatment on severity of COVID-19. *European Journal of Cancer*. 2020;141:92-104. doi:10.1016/j.ejca.2020.09.028
21. Wang J, Vahid S, Eberg M, et al. Clearing the surgical backlog caused by COVID-19 in Ontario: a time series modelling study. *CMAJ*. 2020;192(44):E1347-E1356. doi:10.1503/cmaj.201521
22. Zaorsky NG, Yu JB, McBride SM, et al. Prostate Cancer Radiation Therapy Recommendations in Response to COVID-19. *Advances in Radiation Oncology*. 2020;5:26-32. doi:10.1016/j.adro.2020.10.003
23. Mirnezami R, Knowles J, Kar A, Glynne-Jones R. Preoperative radiotherapy for locally advanced rectal cancer during and after the COVID-19 pandemic. *British Journal of Surgery*. 2020;107(8):e263-e263. doi:10.1002/bjs.11725
24. Office of the Premier. Ontario temporarily moving to modified step two of the roadmap to reopen. *Ontario Newsroom*. <https://news.ontario.ca/en/release/1001394/ontario-temporarily-moving-to-modified-step-two-of-the-roadmap-to-reopen>. Published January 3, 2022. Accessed January 4, 2022.
25. Hanna TP, King WD, Thibodeau S, et al. Mortality due to cancer treatment delay: systematic review and meta-analysis. *BMJ*. Published online November 4, 2020:m4087. doi:10.1136/bmj.m4087
26. Fligor SC, Wang S, Allar BG, et al. Gastrointestinal Malignancies and the COVID-19 Pandemic: Evidence-Based Triage to Surgery. *J Gastrointest Surg*. 2020;24(10):2357-2373. doi:10.1007/s11605-020-04712-5

**Figure 1** Flow diagram showing the creation of study cohort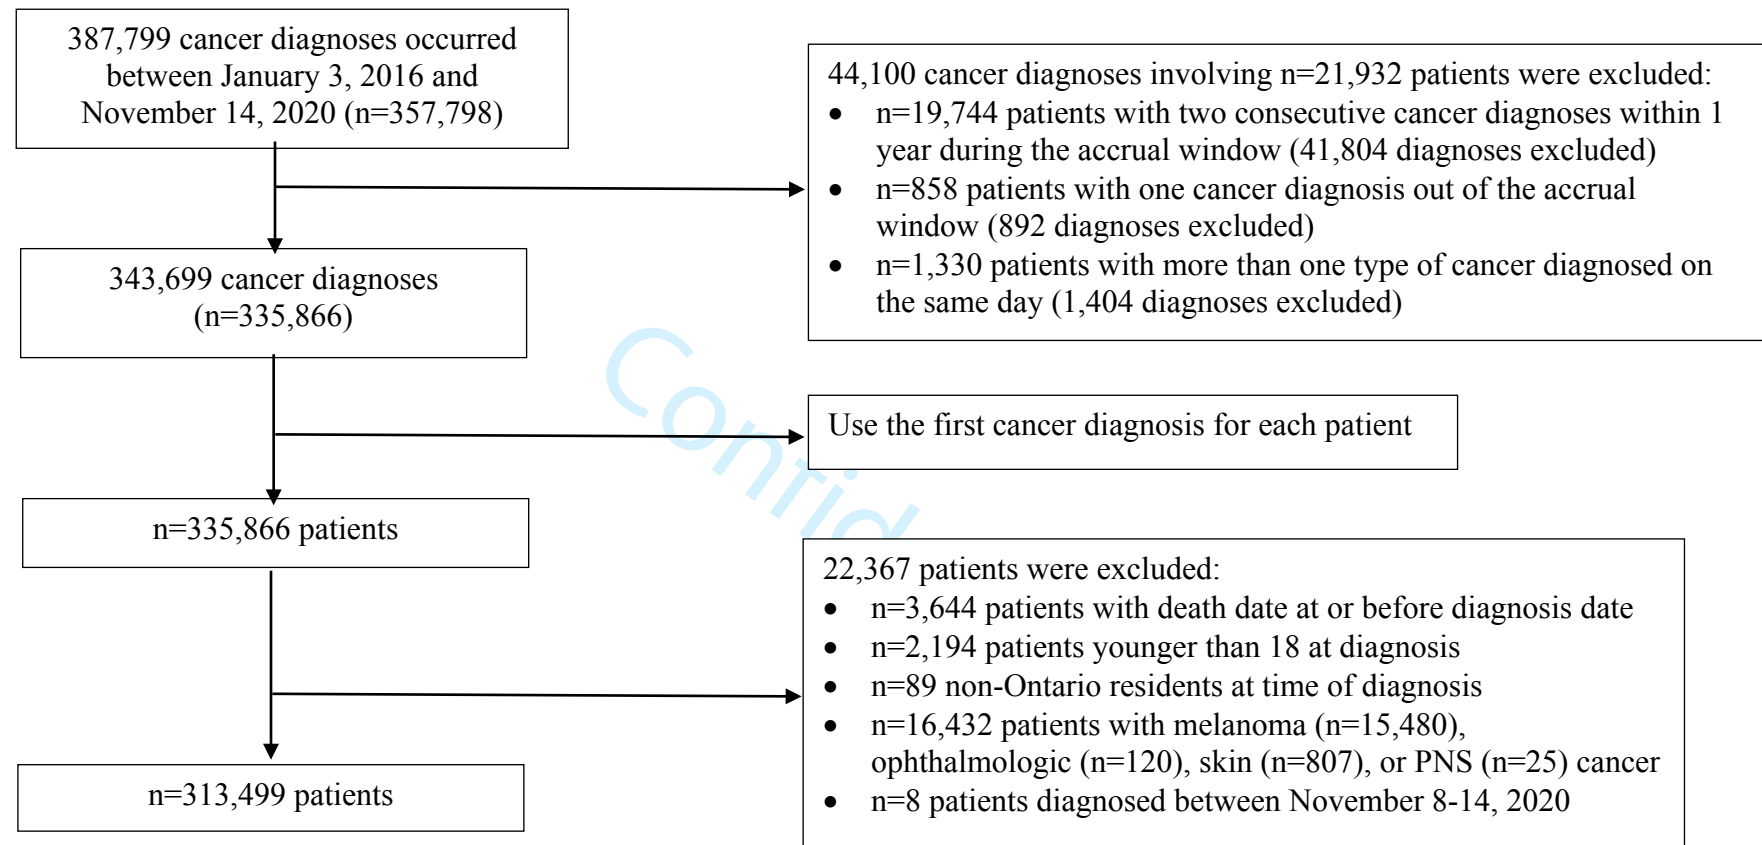

*Notes:* The number of patients (n) at each stage of exclusion is reported in the parentheses. We excluded patients with a diagnosis of melanoma or skin cancer to ensure a robust capture of cancer-directed surgical procedures performed at hospital since these cancers are frequently treated in a clinic setting. We also excluded persons with ophthalmologic and paraneoplastic neurological syndromes (PNS) cancer due to their small numbers. Because the Ontario Cancer Registry (OCR) database had reliable data until November 7, 2020 at the time of this analysis, we used November 7, 2020 to be the last date of the accrual window and thus excluded the 8 patients who were diagnosed in November 8-14, 2020.

**Table 1** Comparing the characteristics of patients diagnosed with cancer during pre-pandemic and pandemic periods (n=313,499)

| Characteristics                                    | Pre-pandemic<br>(n=283,897, 90.6%) | Pandemic<br>(n=29,602, 9.4%) | Standardized<br>difference <sup>1</sup> |
|----------------------------------------------------|------------------------------------|------------------------------|-----------------------------------------|
| <b>Age at diagnosis</b> , mean $\pm$ SD, year      | 66.38 $\pm$ 14.09                  | 66.17 $\pm$ 14.16            | 0.01                                    |
| <b>Female</b>                                      | 144,755 (51.0%)                    | 15,065 (50.9%)               | 0                                       |
| <b>Rural residents<sup>2</sup></b>                 | 35,712 (12.6%)                     | 3,941 (13.3%)                | 0.02                                    |
| <b>Immigrants</b>                                  | 35,152 (12.4%)                     | 3,714 (12.5%)                | 0                                       |
| <b>Material deprivation quintile<sup>2,3</sup></b> |                                    |                              |                                         |
| 1, least deprived                                  | 60,230 (21.2%)                     | 6,450 (21.8%)                | 0.01                                    |
| 2                                                  | 58,065 (20.5%)                     | 6,065 (20.5%)                | 0                                       |
| 3                                                  | 54,770 (19.3%)                     | 5,783 (19.5%)                | 0.01                                    |
| 4                                                  | 54,509 (19.2%)                     | 5,577 (18.8%)                | 0.01                                    |
| 5, most deprived                                   | 53,969 (19.0%)                     | 5,465 (18.5%)                | 0.01                                    |
| <b>Region of residence</b>                         |                                    |                              |                                         |
| Central                                            | 82,566 (29.1%)                     | 8,631 (29.2%)                | 0                                       |
| East                                               | 73,073 (25.7%)                     | 7,553 (25.5%)                | 0.01                                    |
| North                                              | 20,000 (7.1%)                      | 2,185 (7.4%)                 | 0.01                                    |
| Toronto                                            | 22,965 (8.1%)                      | 2,217 (7.5%)                 | 0.02                                    |
| West                                               | 85,271 (30.0%)                     | 9,014 (30.4%)                | 0.01                                    |
| <b>Cancer type</b>                                 |                                    |                              |                                         |
| Breast                                             | 44,135 (15.5%)                     | 4,546 (15.4%)                | 0.01                                    |
| Central nervous system                             | 3,796 (1.3%)                       | 467 (1.6%)                   | 0.02                                    |
| Cervical                                           | 2,297 (0.8%)                       | 239 (0.8%)                   | 0                                       |
| Colorectal                                         | 32,249 (11.4%)                     | 3,352 (11.3%)                | 0                                       |
| Endocrine                                          | 11,468 (4.0%)                      | 1,075 (3.6%)                 | 0.02                                    |
| Esophagus                                          | 2,938 (1.0%)                       | 380 (1.3%)                   | 0.02                                    |
| Genitourinary                                      | 20,866 (7.3%)                      | 2,417 (8.2%)                 | 0.03                                    |
| Gynecologic excluding cervical                     | 15,681 (5.5%)                      | 1,739 (5.9%)                 | 0.02                                    |
| Head and neck                                      | 8,843 (3.1%)                       | 979 (3.3%)                   | 0.01                                    |
| Hepato-pancreatic biliary                          | 14,438 (5.1%)                      | 1,523 (5.1%)                 | 0                                       |
| Lung                                               | 36,431 (12.8%)                     | 3,780 (12.8%)                | 0                                       |
| Lymphoma                                           | 15,924 (5.6%)                      | 1,523 (5.1%)                 | 0.02                                    |
| Prostate                                           | 35,200 (12.4%)                     | 3,448 (11.6%)                | 0.02                                    |
| Sarcoma                                            | 4,205 (1.5%)                       | 445 (1.5%)                   | 0                                       |
| Stomach                                            | 5,132 (1.8%)                       | 536 (1.8%)                   | 0                                       |
| Other                                              | 30,294 (10.7%)                     | 3,153 (10.7%)                | 0                                       |
| <b>Comorbidity<sup>4</sup></b>                     |                                    |                              |                                         |
| 0                                                  | 27,086 (9.5%)                      | 3,091 (10.4%)                | 0.03                                    |
| 1                                                  | 22,647 (8.0%)                      | 2,367 (8.0%)                 | 0                                       |
| 2                                                  | 16,832 (5.9%)                      | 1,533 (5.2%)                 | 0.03                                    |
| 3 or more                                          | 24,422 (8.6%)                      | 2,190 (7.4%)                 | 0.04                                    |
| No hospitalization                                 | 192,910 (68.0%)                    | 20,421 (69.0%)               | 0.02                                    |



1  
2  
3 <sup>1</sup> We used 0.1 as the threshold to declare a statistically significant and clinically meaningful imbalance in  
4 the distributions of the characteristics.  
5

6 <sup>2</sup> Missing data were between 0.2%-0.9% of the study cohort. Missing pattern did not differ between the  
7 two groups (standardized differences ranging from 0 to 0.01).  
8

9 <sup>3</sup> Material deprivation encompasses the proportion of a population that is without a high school diploma,  
10 lone-parent families, receiving government transfer payments, unemployed, low-income, and living in  
11 dwellings needing major repair. This measure was derived from the material deprivation dimension of the  
12 Ontario Marginalization Index.  
13

14 <sup>4</sup> We used the Elixhauser Comorbidity Index to measure comorbidities using a 5-year look-back window  
15 in administrative data for any hospitalization.  
16

17 SD, standard deviation.  
18  
19  
20  
21  
22  
23  
24  
25  
26  
27  
28  
29  
30  
31  
32  
33  
34  
35  
36  
37  
38  
39  
40  
41  
42  
43  
44  
45  
46  
47  
48  
49  
50  
51  
52  
53  
54  
55  
56  
57  
58  
59  
60

Confidential

1  
2  
3  
4  
5  
6  
7  
8  
9  
10  
11  
12  
13  
14  
15  
16  
17  
18  
19  
20  
21  
22  
23  
24  
25  
26  
27  
28  
29  
30  
31  
32  
33  
34  
35  
36  
37  
38  
39  
40  
41  
42  
43  
44  
45  
46  
47

**Table 2** Impact of COVID-19 on the weekly number of first cancer treatment recipients per thousand persons with cancer

| Parameters <sup>1</sup>                                                                           | Surgery                                      | Chemotherapy                                | Radiation                                   | Untreated                                   | Treated <sup>2</sup>                           |
|---------------------------------------------------------------------------------------------------|----------------------------------------------|---------------------------------------------|---------------------------------------------|---------------------------------------------|------------------------------------------------|
| Relative change in rate (pre-pandemic slope <sup>3</sup> )                                        | 0.99995<br>(0.9999-1.0000)<br>p-value = 0.32 | 1.0008<br>(1.0007-1.0010)<br>p-value < 0.01 | 1.0006<br>(1.0004-1.0007)<br>p-value < 0.01 | 0.9992<br>(0.9990-0.9993)<br>p-value < 0.01 | 1.00027<br>(1.00023-1.00032)<br>p-value < 0.01 |
| Relative change in mean rate at the start of COVID-19 <sup>3</sup> (relative change in intercept) | 0.86<br>(0.82-0.90)<br>p-value < 0.01        | 1.38<br>(1.30-1.46)<br>p-value < 0.01       | 1.12<br>(1.05-1.18)<br>p-value < 0.01       | 0.90<br>(0.84-0.96)<br>p-value < 0.01       | 1.03<br>(1.01-1.05)<br>p-value < 0.01          |
| Relative change in rate (further change in slope from pre-pandemic to the pandemic <sup>4</sup> ) | 1.007<br>(1.005-1.010)<br>p-value < 0.01     | 0.985<br>(0.982-0.988)<br>p-value < 0.01    | 0.995<br>(0.992-0.998)<br>p-value < 0.01    | 1.003<br>(0.9997-1.007)<br>p-value = 0.08   | 0.999<br>(0.998-1.000)<br>p-value = 0.09       |

<sup>1</sup> Parameters were estimated from segmented Poisson regression using the standard parameterization. For each parameter, we report the ratio, the associated 95% confidence interval (in parenthesis) and the p-value testing whether the ratio equals to 1. The regression coefficients can be interpreted as followed: the weekly number of patients receiving surgery as first cancer treatment per thousand patients (rate) was initially stable (p-value=0.32) in pre-pandemic, followed by a decline in mean rate of 14% at the start of the pandemic, then a weekly rise of 0.7% (i.e., 1.007 \* 0.99995 = 1.00695 or an 0.7% overall weekly increase) during the pandemic.

<sup>2</sup> These are patients who were treated by one of surgery, chemotherapy, or radiation therapy within 1-year after the date of cancer diagnosis.

<sup>3</sup> We use March 15, 2020 to proxy the start of the COVID-19 pandemic in Ontario, Canada as hospitals across the province were advised to halt non-emergent or elective procedures. Pre-pandemic period is from January 3, 2016 to March 14, 2020.

<sup>4</sup> The pandemic period is from March 15, 2020 to November 7, 2020.

**Figure 2** Trends in the modality of first cancer treatment during pre-pandemic and pandemic periods in Ontario, Canada

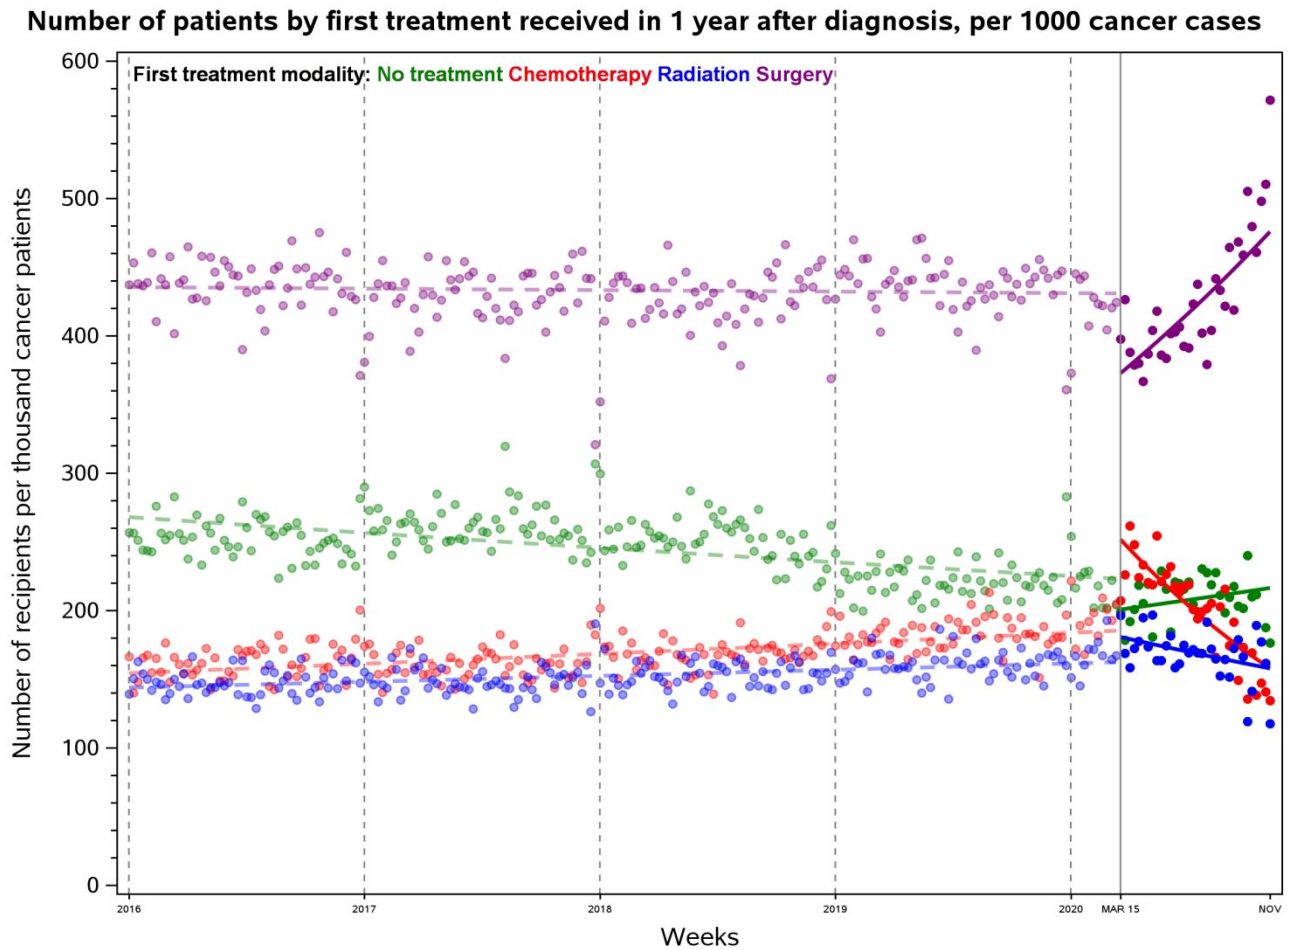

We used dots and lines to denote the observed and predicted weekly recipient volume per thousand persons with cancer. Upfront surgical and chemotherapy rates have both fully recovered to pre-pandemic levels at the week of July 26, 2020 – August 1, 2020 and the week of August 2 – 8, 2020, respectively.

## Impact of the COVID-19 pandemic on choice of first cancer treatment: a population-based study

### Appendix 1. Identifying cancer types from the Ontario Cancer Registry (OCR)

| Cancer site                    | ICD-O-3 code                                                                                                                                                                                                                                                                                                                                                                                                                                                                                                                                                                                                                                                                                                                                                                                                                                                                                                                                                                                                         |
|--------------------------------|----------------------------------------------------------------------------------------------------------------------------------------------------------------------------------------------------------------------------------------------------------------------------------------------------------------------------------------------------------------------------------------------------------------------------------------------------------------------------------------------------------------------------------------------------------------------------------------------------------------------------------------------------------------------------------------------------------------------------------------------------------------------------------------------------------------------------------------------------------------------------------------------------------------------------------------------------------------------------------------------------------------------|
| Breast                         | C50                                                                                                                                                                                                                                                                                                                                                                                                                                                                                                                                                                                                                                                                                                                                                                                                                                                                                                                                                                                                                  |
| Central nervous system         | C70.0, C70.1, C70.9, C71, C72                                                                                                                                                                                                                                                                                                                                                                                                                                                                                                                                                                                                                                                                                                                                                                                                                                                                                                                                                                                        |
| Colorectal                     | C17, C18, C19.9, C20.9, C21.0, C21.1, C21.2, C21.8                                                                                                                                                                                                                                                                                                                                                                                                                                                                                                                                                                                                                                                                                                                                                                                                                                                                                                                                                                   |
| Cervical                       | C53.0, C53.1, C53.8, C53.9                                                                                                                                                                                                                                                                                                                                                                                                                                                                                                                                                                                                                                                                                                                                                                                                                                                                                                                                                                                           |
| Endocrine                      | C73.9, C74.0, C74.1, C74.9, C75                                                                                                                                                                                                                                                                                                                                                                                                                                                                                                                                                                                                                                                                                                                                                                                                                                                                                                                                                                                      |
| Esophagus                      | C15                                                                                                                                                                                                                                                                                                                                                                                                                                                                                                                                                                                                                                                                                                                                                                                                                                                                                                                                                                                                                  |
| Genitourinary                  | C60, C62, C64, C65, C66, C67, C68                                                                                                                                                                                                                                                                                                                                                                                                                                                                                                                                                                                                                                                                                                                                                                                                                                                                                                                                                                                    |
| Gynecological exclude cervical | C51, C52, C54, C55, C56, C57                                                                                                                                                                                                                                                                                                                                                                                                                                                                                                                                                                                                                                                                                                                                                                                                                                                                                                                                                                                         |
| Head and neck                  | C10.0, C10.1, C10.2, C10.3, C10.4, C10.8, C10.9, C01.9, C02.0, C02.1, C02.2, C02.3, C02.4, C02.8, C02.9, C03.0, C03.1, C03.9, C04.0, C04.1, C04.8, C04.9, C05.0, C05.1, C05.2, C05.8, C05.9, C06.0, C06.1, C06.2, C06.8, C06.9, C07.9, C08.0, C08.1, C08.8, C08.9, C09.0, C09.1, C09.8, C09.9, C11.0, C11.1, C11.2, C11.3, C11.8, C11.9, C12.9, C14.0, C14.2, C14.8, C76.0, C06.9, C14.8, C32.0, C32.1, C32.3, C32.8, C32.9, C13.0, C13.1, C13.2, C13.8, C13.9, C00.0, C00.1, C00.2, C00.3, C00.4, C00.5, C00.6, C00.8, C00.9, C14.8, C44.0                                                                                                                                                                                                                                                                                                                                                                                                                                                                          |
| Hepatic, pancreatic or biliary | C22.0, C22.1, C23, C24, C25                                                                                                                                                                                                                                                                                                                                                                                                                                                                                                                                                                                                                                                                                                                                                                                                                                                                                                                                                                                          |
| Lung                           | C34                                                                                                                                                                                                                                                                                                                                                                                                                                                                                                                                                                                                                                                                                                                                                                                                                                                                                                                                                                                                                  |
| Lymphoma                       | C77                                                                                                                                                                                                                                                                                                                                                                                                                                                                                                                                                                                                                                                                                                                                                                                                                                                                                                                                                                                                                  |
| Prostate                       | C61.9                                                                                                                                                                                                                                                                                                                                                                                                                                                                                                                                                                                                                                                                                                                                                                                                                                                                                                                                                                                                                |
| Sarcoma                        | C00.0, C00.1, C00.3, C00.5, C00.9, C01.9 to C02.3, C02.8 to C03.1, C03.9, C04.0, C04.9, C05.0, C05.1, C05.9, C06.0, C06.2, C06.9, C07.9, C08.0, C08.9, C09.0, C09.9, C10.3, C10.9, C11.0 to C11.3, C11.8, C11.9, C13.0, C13.1, C13.8, C13.9, C14.0, C14.8, C15.0, C15.3, C15.4, C15.5, C15.9, C16.0 to C16.6, C16.8 to C17.3, C17.8 to C18.9, C19.9, C20.9, C22.0, C22.1, C23.9 to C24.1, C24.9 to C25.2, C25.9, C30.0, C30.1, C31.1 to C31.3, C31.8 to C32.3, C32.9, C33.9 to C34.3, C34.8, C34.9, C37.9 to C38.3, C40.1 to C40.3, C40.8 to C41.4, C41.9, C42.1 to C42.4, C44.0 to C44.9, C47.0 to C47.9, C49.0 to C49.9, C50.0 to C51.2, C51.8, C51.9, C52.9 to C53.1, C53.8 to C54.3, C54.8, C54.9, C56.9 to C57.4, C57.7 to C57.9, C60.0 to C60.2, C60.9, C61.9 to C62.1, C62.9 to C63.2, C63.7 to C63.9, C64.9, C65.9, C66.9 to C68.0, C68.8, C69.0, C69.3, C69.6, C69.8, C70.0, C70.1, C70.9 to C72.0, C72.5, C72.9, C73.9 to C74.1, C74.9, C75.5, C77.0 to C77.9 with morphology code 803*, 831*, 871*, 880*- |

| Cancer site | ICD-O-3 code                                                                                                                 |
|-------------|------------------------------------------------------------------------------------------------------------------------------|
|             | 885*, 890*-900*, 912*, 914*, 917*-919*, 922*-924*, 926*, 933*, 944*, 948*, 953*, 958*, 974*-975*, 993*                       |
| Stomach     | C16                                                                                                                          |
| Other       | C26.0, C26.8, C26.9, C30, C31, C32.2, C33.9, C37.9, C38, C39, C40, C41, C42.0-C42.4, C44.1, C48, C49, C58.9, C63, C76, C80.9 |

We did not include melanoma and skin cancer to ensure a reliable capture of hospital-based cancer-directed surgical procedures as these cancers are frequently treated in the outpatient setting. We also excluded ophthalmologic and paraneoplastic neurological syndromes as these cancers were extremely rare in our cohort (<0.04% of the cohort).

Confidential

1  
2  
3  
4  
5  
6  
7  
8  
9  
10  
11  
12  
13  
14  
15  
16  
17  
18  
19  
20  
21  
22  
23  
24  
25  
26  
27  
28  
29  
30  
31  
32  
33  
34  
35  
36  
37  
38  
39  
40  
41  
42  
43  
44  
45  
46  
47  
48  
49  
50  
51  
52  
53  
54  
55  
56  
57  
58  
59  
60

**Appendix 2.** Modality of first cancer treatment received within 1 year after cancer diagnosis stratified by cancer type

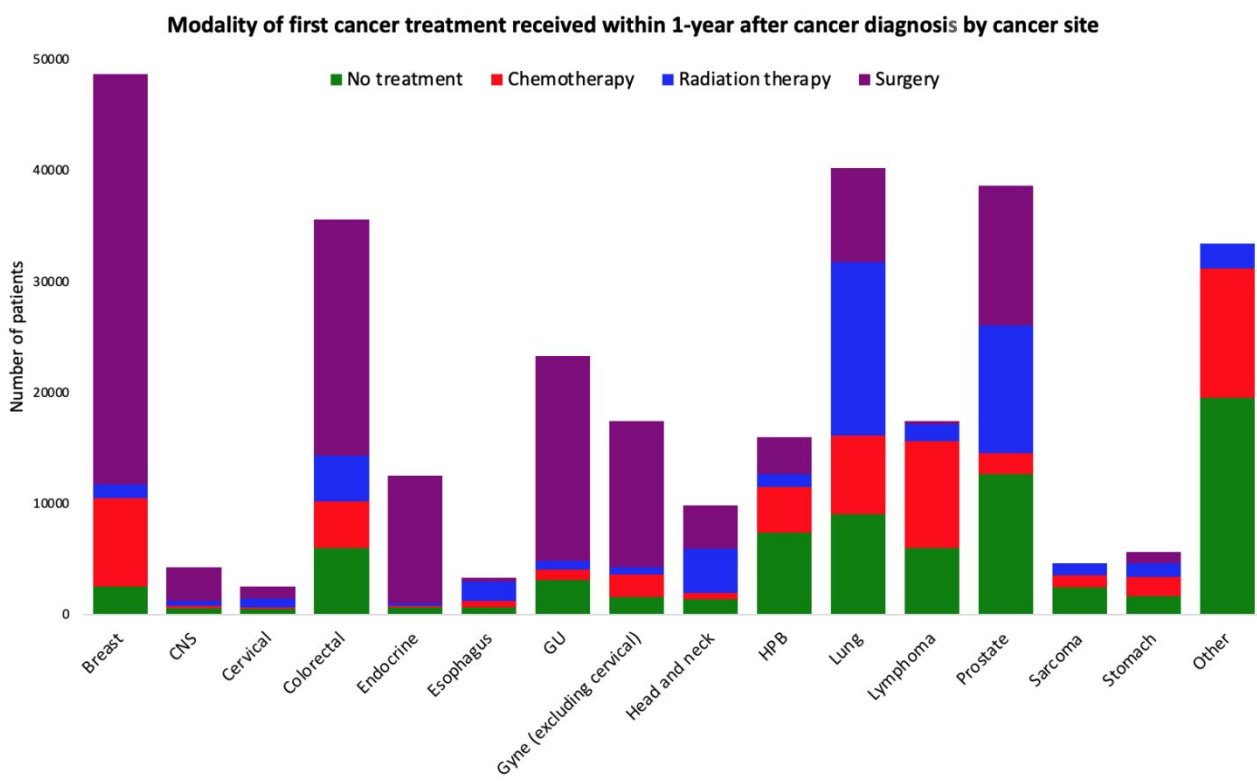

*Abbreviations:* CNS, Central nervous system; GU, Genitourinary; HPB, Hepato-pancreatic biliary.

STROBE Statement—Checklist of items that should be included in reports of *cohort studies*

|                              | Item No | Recommendation                                                                                                                                                                                                                                                                                                         | Page No    |
|------------------------------|---------|------------------------------------------------------------------------------------------------------------------------------------------------------------------------------------------------------------------------------------------------------------------------------------------------------------------------|------------|
| <b>Title and abstract</b>    | 1       | (a) Indicate the study's design with a commonly used term in the title or the abstract<br>(b) Provide in the abstract an informative and balanced summary of what was done and what was found                                                                                                                          | i, iii     |
| <b>Introduction</b>          |         |                                                                                                                                                                                                                                                                                                                        |            |
| Background/rationale         | 2       | Explain the scientific background and rationale for the investigation being reported                                                                                                                                                                                                                                   | 1          |
| Objectives                   | 3       | State specific objectives, including any prespecified hypotheses                                                                                                                                                                                                                                                       | 1          |
| <b>Methods</b>               |         |                                                                                                                                                                                                                                                                                                                        |            |
| Study design                 | 4       | Present key elements of study design early in the paper                                                                                                                                                                                                                                                                | 1          |
| Setting                      | 5       | Describe the setting, locations, and relevant dates, including periods of recruitment, exposure, follow-up, and data collection                                                                                                                                                                                        | 1-2        |
| Participants                 | 6       | (a) Give the eligibility criteria, and the sources and methods of selection of participants. Describe methods of follow-up<br>(b) For matched studies, give matching criteria and number of exposed and unexposed                                                                                                      | 2          |
| Variables                    | 7       | Clearly define all outcomes, exposures, predictors, potential confounders, and effect modifiers. Give diagnostic criteria, if applicable                                                                                                                                                                               | 3          |
| Data sources/<br>measurement | 8*      | For each variable of interest, give sources of data and details of methods of assessment (measurement). Describe comparability of assessment methods if there is more than one group                                                                                                                                   | 2-3        |
| Bias                         | 9       | Describe any efforts to address potential sources of bias                                                                                                                                                                                                                                                              | NA         |
| Study size                   | 10      | Explain how the study size was arrived at                                                                                                                                                                                                                                                                              | Fig 1      |
| Quantitative variables       | 11      | Explain how quantitative variables were handled in the analyses. If applicable, describe which groupings were chosen and why                                                                                                                                                                                           | 3          |
| Statistical methods          | 12      | (a) Describe all statistical methods, including those used to control for confounding<br>(b) Describe any methods used to examine subgroups and interactions<br>(c) Explain how missing data were addressed<br>(d) If applicable, explain how loss to follow-up was addressed<br>(e) Describe any sensitivity analyses | 3-4        |
| <b>Results</b>               |         |                                                                                                                                                                                                                                                                                                                        |            |
| Participants                 | 13*     | (a) Report numbers of individuals at each stage of study—eg numbers potentially eligible, examined for eligibility, confirmed eligible, included in the study, completing follow-up, and analysed<br>(b) Give reasons for non-participation at each stage<br>(c) Consider use of a flow diagram                        | 4, Fig 1   |
| Descriptive data             | 14*     | (a) Give characteristics of study participants (eg demographic, clinical, social) and information on exposures and potential confounders<br>(b) Indicate number of participants with missing data for each variable of interest<br>(c) Summarise follow-up time (eg, average and total amount)                         | 4, Table 1 |
| Outcome data                 | 15*     | Report numbers of outcome events or summary measures over time                                                                                                                                                                                                                                                         | 4          |

|    |                          |    |                                                                                                                                                                                                              |                     |
|----|--------------------------|----|--------------------------------------------------------------------------------------------------------------------------------------------------------------------------------------------------------------|---------------------|
| 1  | Main results             | 16 | (a) Give unadjusted estimates and, if applicable, confounder-adjusted estimates and their precision (eg, 95% confidence interval). Make clear which confounders were adjusted for and why they were included | 4-5, Table 2, Fig 2 |
| 2  |                          |    |                                                                                                                                                                                                              |                     |
| 3  |                          |    | (b) Report category boundaries when continuous variables were categorized                                                                                                                                    |                     |
| 4  |                          |    | (c) If relevant, consider translating estimates of relative risk into absolute risk for a meaningful time period                                                                                             |                     |
| 5  | Other analyses           | 17 | Report other analyses done—eg analyses of subgroups and interactions, and sensitivity analyses                                                                                                               | NA                  |
| 6  | <b>Discussion</b>        |    |                                                                                                                                                                                                              |                     |
| 7  | Key results              | 18 | Summarise key results with reference to study objectives                                                                                                                                                     | 5                   |
| 8  | Limitations              | 19 | Discuss limitations of the study, taking into account sources of potential bias or imprecision. Discuss both direction and magnitude of any potential bias                                                   | 8-9                 |
| 9  | Interpretation           | 20 | Give a cautious overall interpretation of results considering objectives, limitations, multiplicity of analyses, results from similar studies, and other relevant evidence                                   | 5-9                 |
| 10 | Generalisability         | 21 | Discuss the generalisability (external validity) of the study results                                                                                                                                        | 8                   |
| 11 | <b>Other information</b> |    |                                                                                                                                                                                                              |                     |
| 12 | Funding                  | 22 | Give the source of funding and the role of the funders for the present study and, if applicable, for the original study on which the present article is based                                                | ii                  |

\*Give information separately for exposed and unexposed groups.

**Note:** An Explanation and Elaboration article discusses each checklist item and gives methodological background and published examples of transparent reporting. The STROBE checklist is best used in conjunction with this article (freely available on the Web sites of PLoS Medicine at <http://www.plosmedicine.org/>, Annals of Internal Medicine at <http://www.annals.org/>, and Epidemiology at <http://www.epidem.com/>). Information on the STROBE Initiative is available at <http://www.strobe-statement.org>.
